# Supplementary material for: The intergenic region of the maize defensin-like protein genes Def1 and Def2 functions as an embryo-specific asymmetric bidirectional promoter
Source: PubMed Central journal article supplement (PMC5301941; doi:10.1093/jxb/erw226), 2016-06-08
Supplement: supp_erw226_supplementary_figures_S1_S6_tables_S1.pdf [file supp_erw226_supplementary_figures_S1_S6_tables_S1.pdf]

## The intergenic region of the maize defensin-like protein genes *Def1* and *Def2* functions as a embryo-specific asymmetric bidirectional promoter

Xiaoqing Liu, Wenzhu Yang, Ye Li, Suzhen Li, Xiaojin Zhou, Qianqian Zhao, Yunliu Fan, Min Lin, and  
Rumei Chen

### Supplementary Files

The following supplementary material is available at *JXB* online.

**Fig. S1** Comparative analysis of the tissue specificity of the polar and bidirectional promoters in transgenic maize plants. Root, stem, and leaf tissues of trefoil-stage transgenic maize plants were used for GUS histochemical staining. Red arrow indicates trace GUS expression.

**Fig. S2** Comparative analysis of the tissue specificity of the polar and bidirectional promoters in transgenic maize plants. Root, stem, leaf, and sheath tissues of large, trumpet-stage transgenic maize plants and tassels, silk, and pollen of transgenic maize plants were used for GUS histochemical staining. Red arrow indicates trace GUS expression.

**Fig. S3** Comparative analysis of the expression patterns of the polar and bidirectional promoters during early developmental stages of transgenic maize plants. (A) Analysis of promoter tissue specificity using GUS histochemical staining in transgenic maize. (B) Analysis of the tissue specificity of *GFP::P<sub>zmDef1</sub>::GUS* in transgenic maize. Red arrow indicates GUS staining sites in the aleurone layer and in embryos; Control tissues corresponding to the various developmental stages are shown on the right side of each photograph. DAP, days after pollination; bars = 1 mm.

**Fig. S4** Analysis of bidirectional promoter tissue specificity in transgenic maize.

**Fig. S5** Characterization of the tissue specificity and expression strength of the *P<sub>Zmdef2</sub>* in transgenic maize plants. (A) Qualitative analysis of bidirectional expression activities of *P<sub>Zmdef2</sub>* in transgenic maize seeds; Bright-I and GFP-I, intact seeds imaged in bright field mode and using a GFP filter set, respectively; Bright-L, GFP-L, and GUS-L, longitudinal sections imaged in bright field mode, using a GFP filter set, and in bright field mode after histochemical staining, respectively. Control tissues

corresponding to the various developmental stages are shown on the right side of each photograph; bars = 1 mm. (B) Quantification of GUS activities level during various developmental stages of seeds from transgenic maize plants. En, endosperm; Em, embryo.

**Fig. S6** The activity of different *GFP::mP<sub>ZmBD1</sub>::GUS* constructs assayed using maize immature embryo transient transformation. (A) to (W) represent the 23 constructs pbd1GG3 to pbd23GG3, respectively. (X), negative control. Bars = 0.5 mm.

**Table S1.** Promoter sequences and cloning primers used in this work.

Figure S1

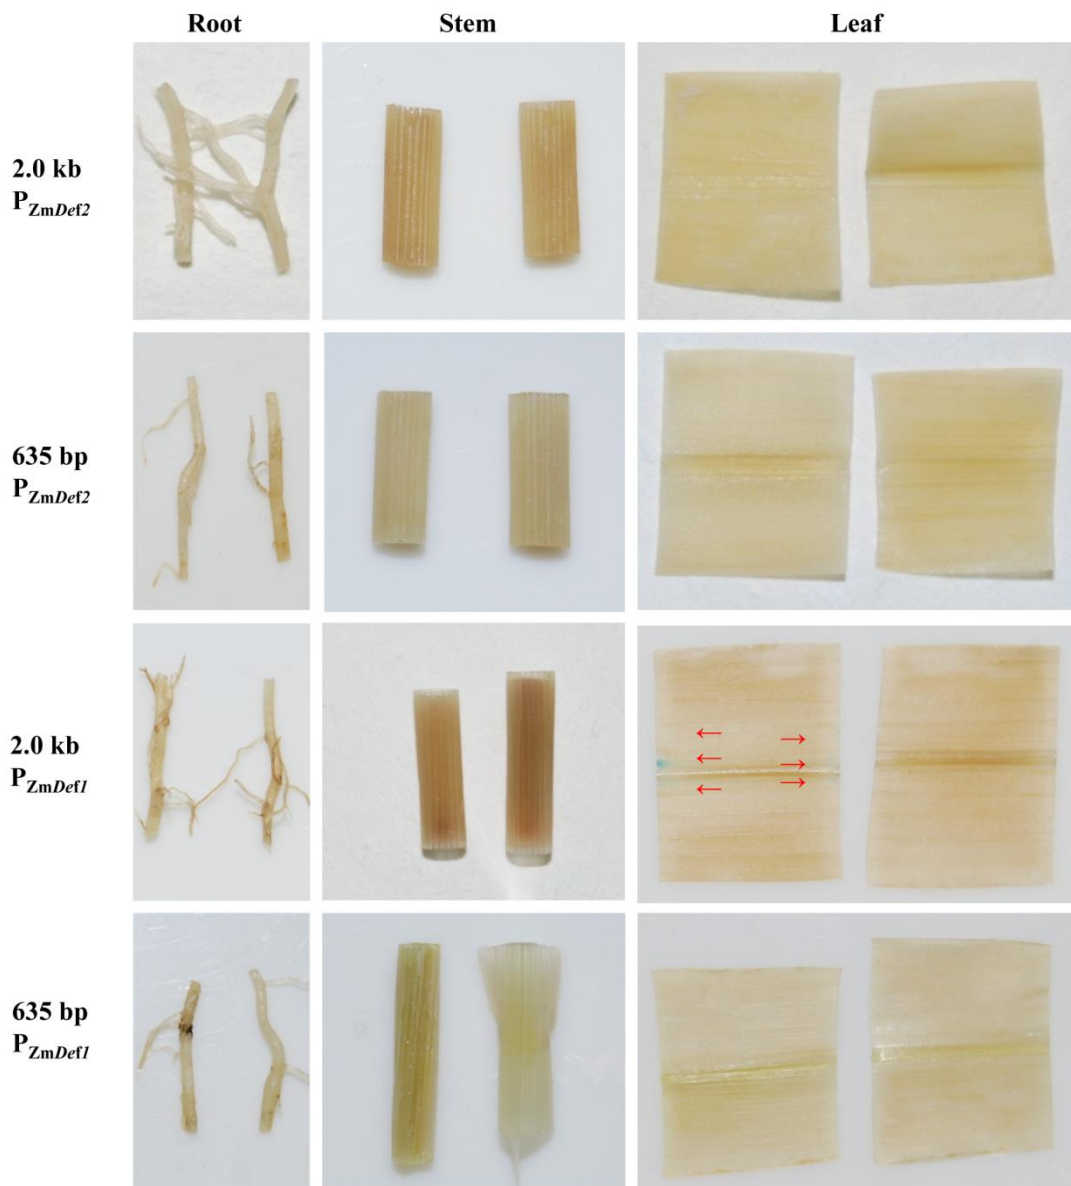

Figure S2

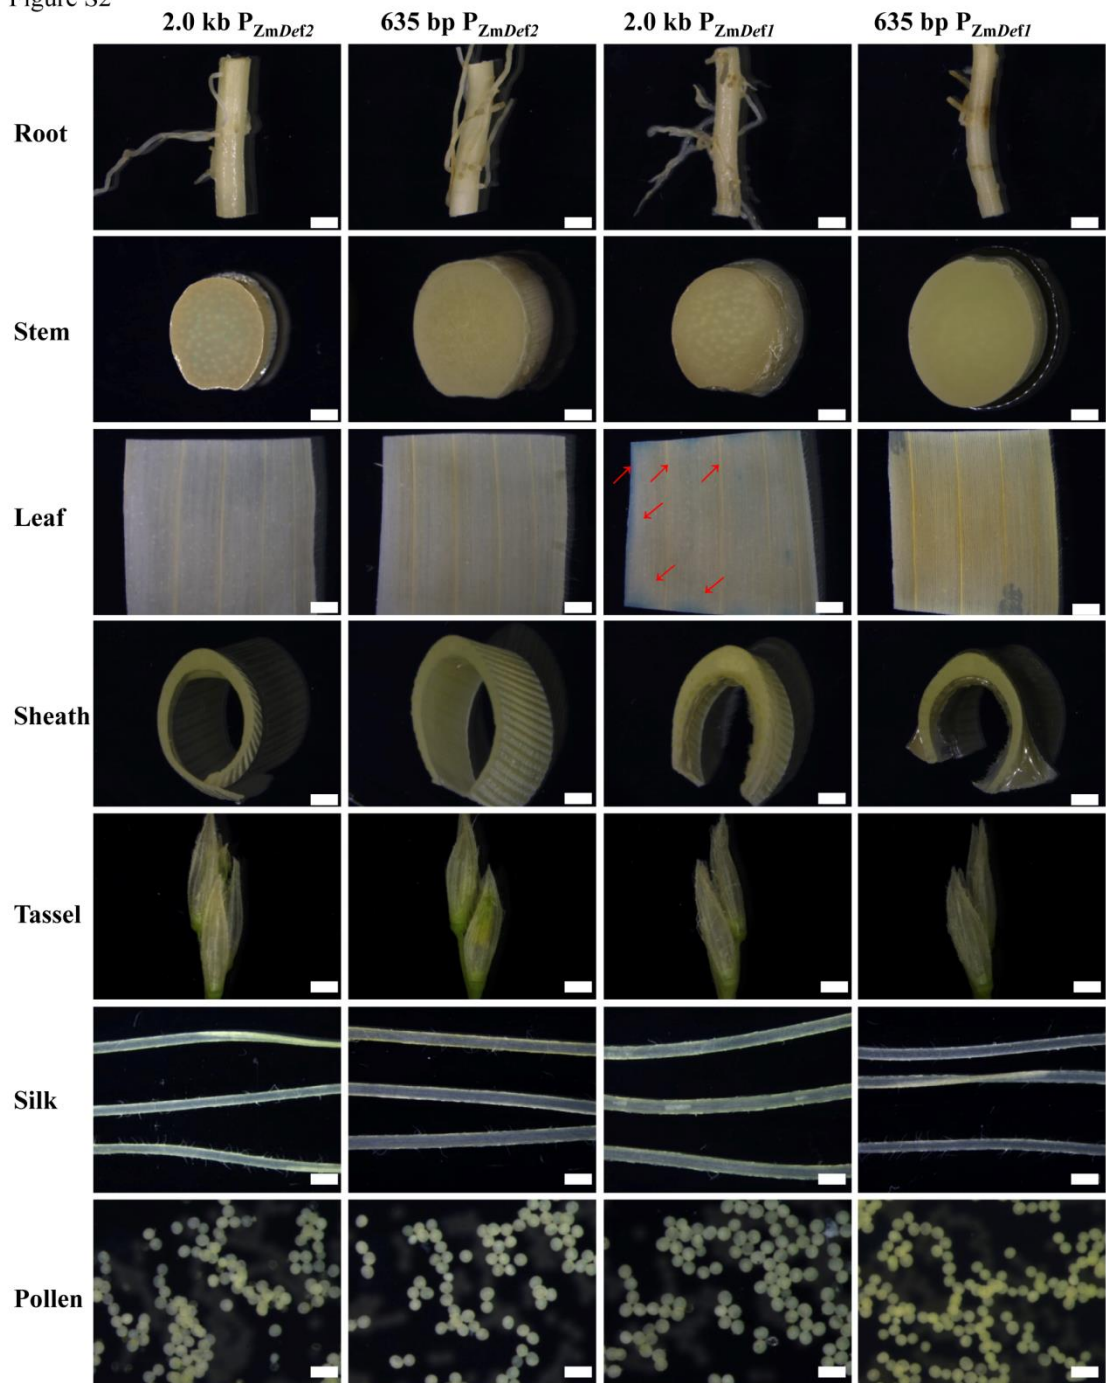

Figure S3

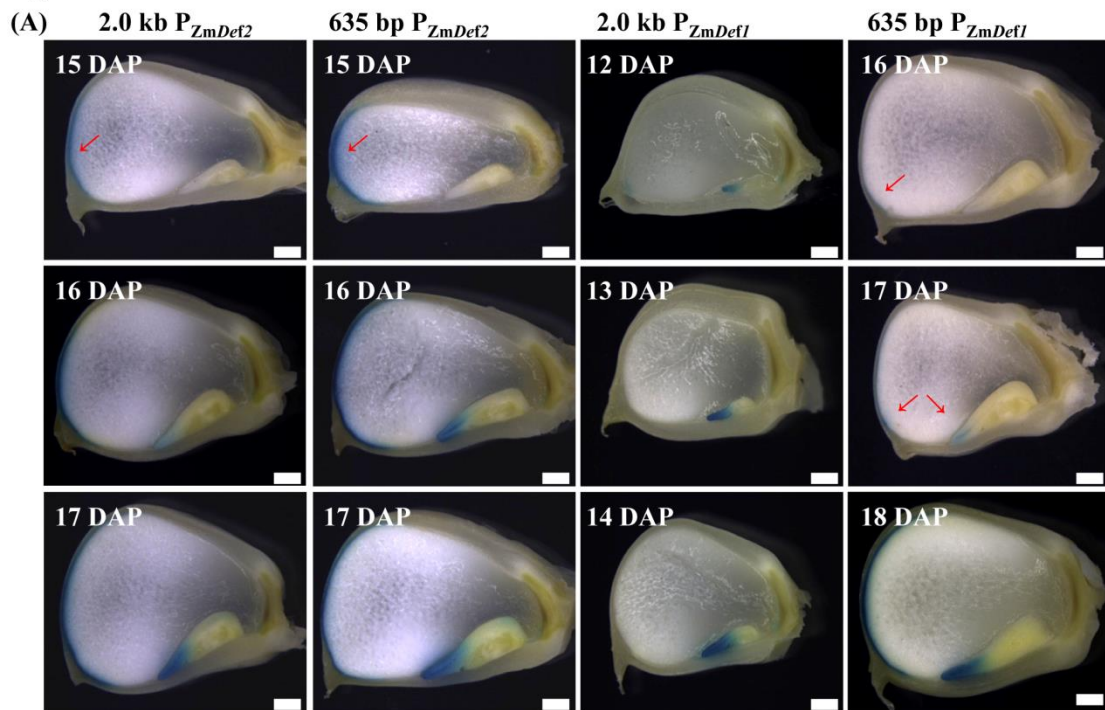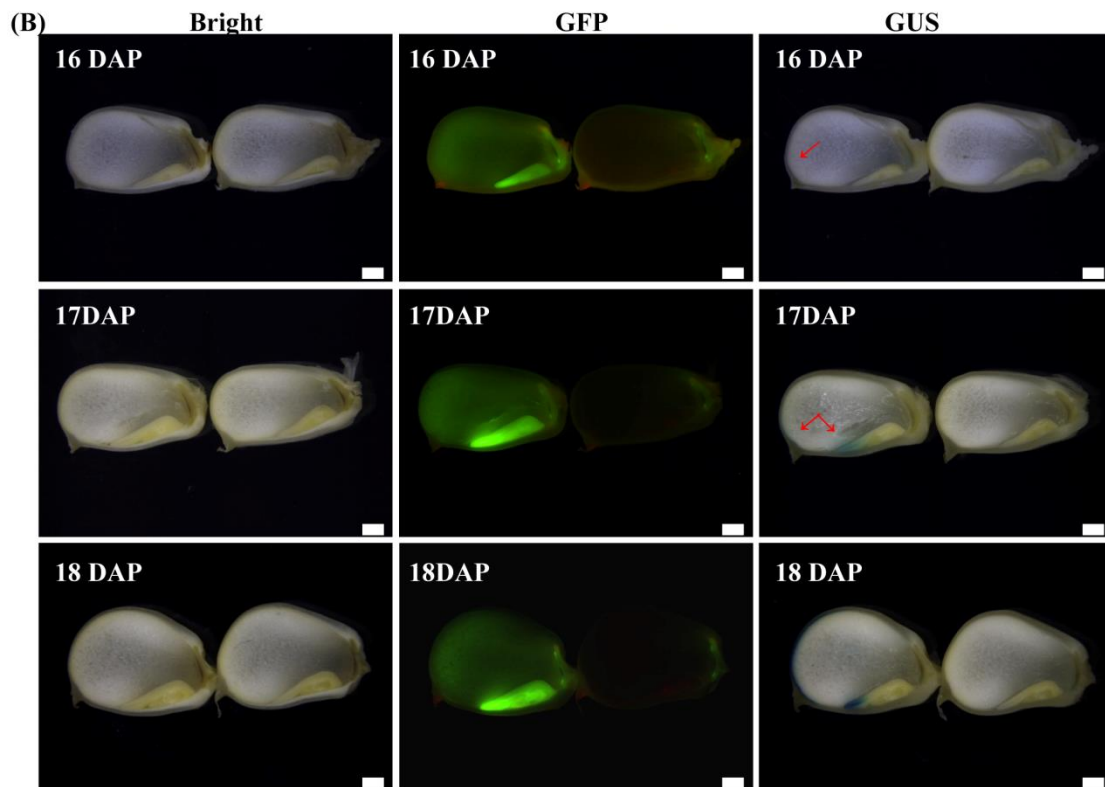

Figure S4

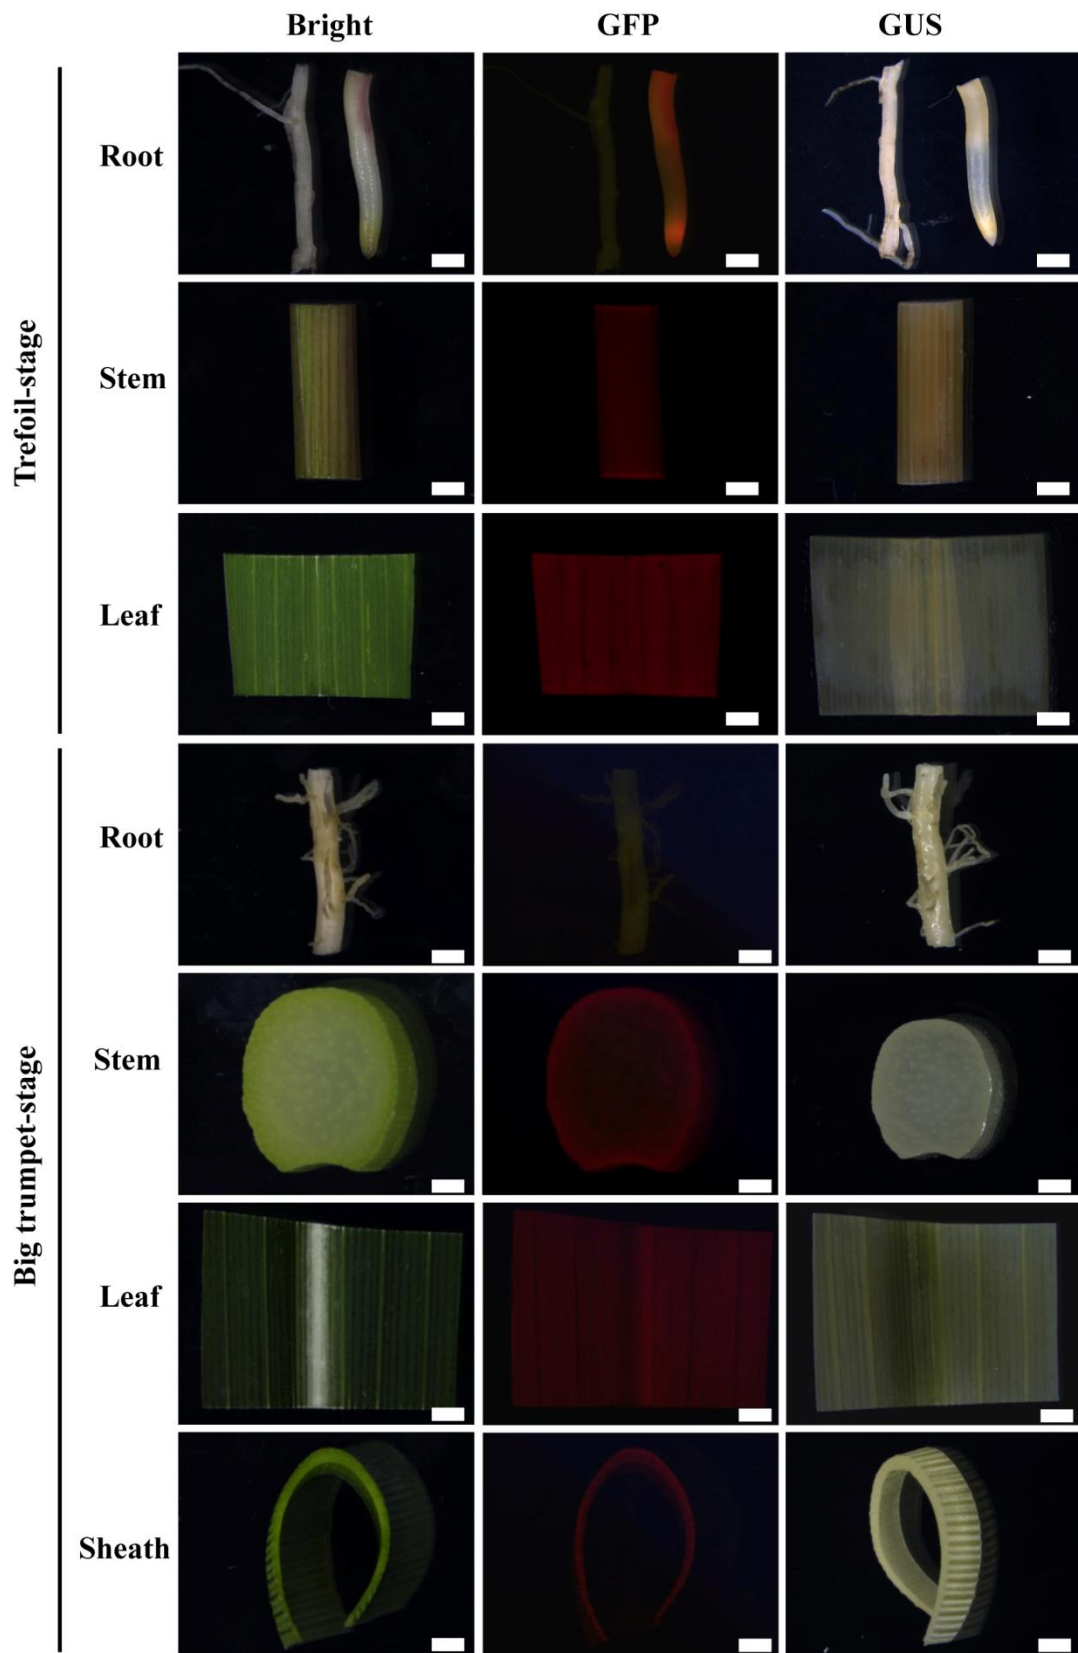

Figure S5

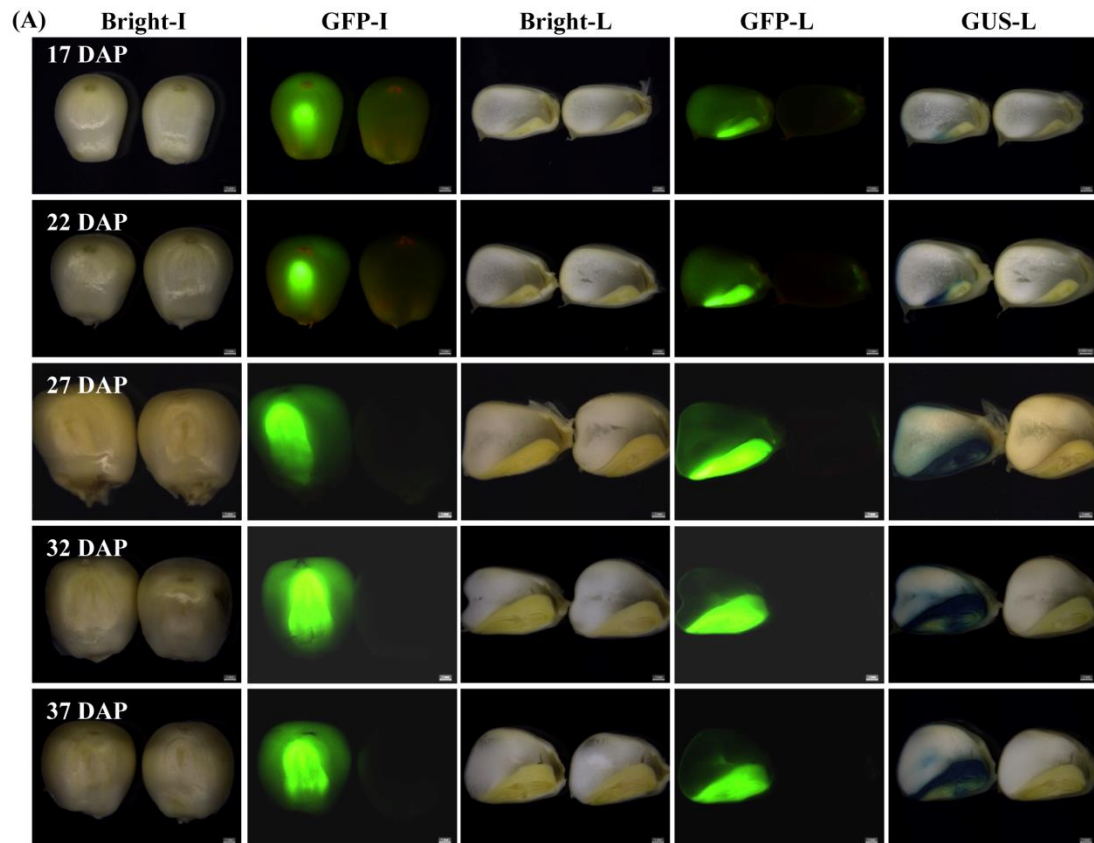

(B)

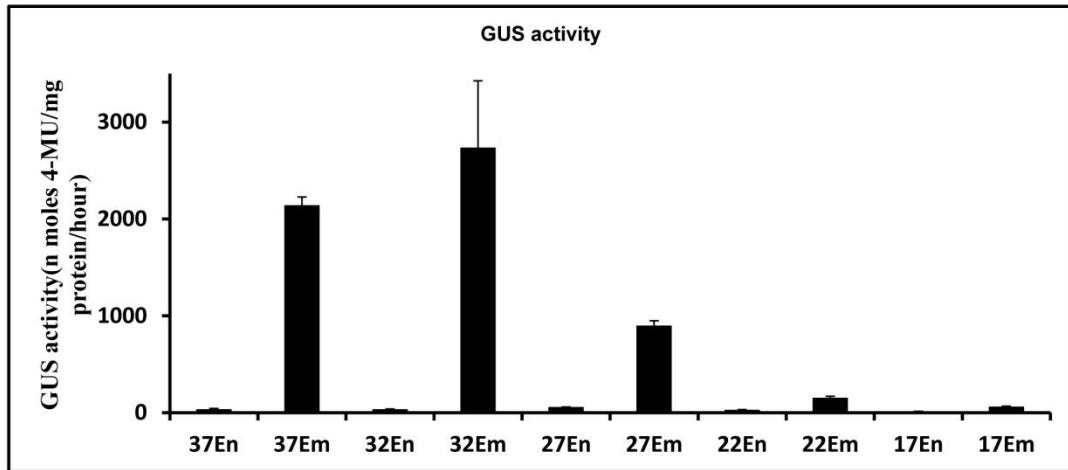

Figure S6

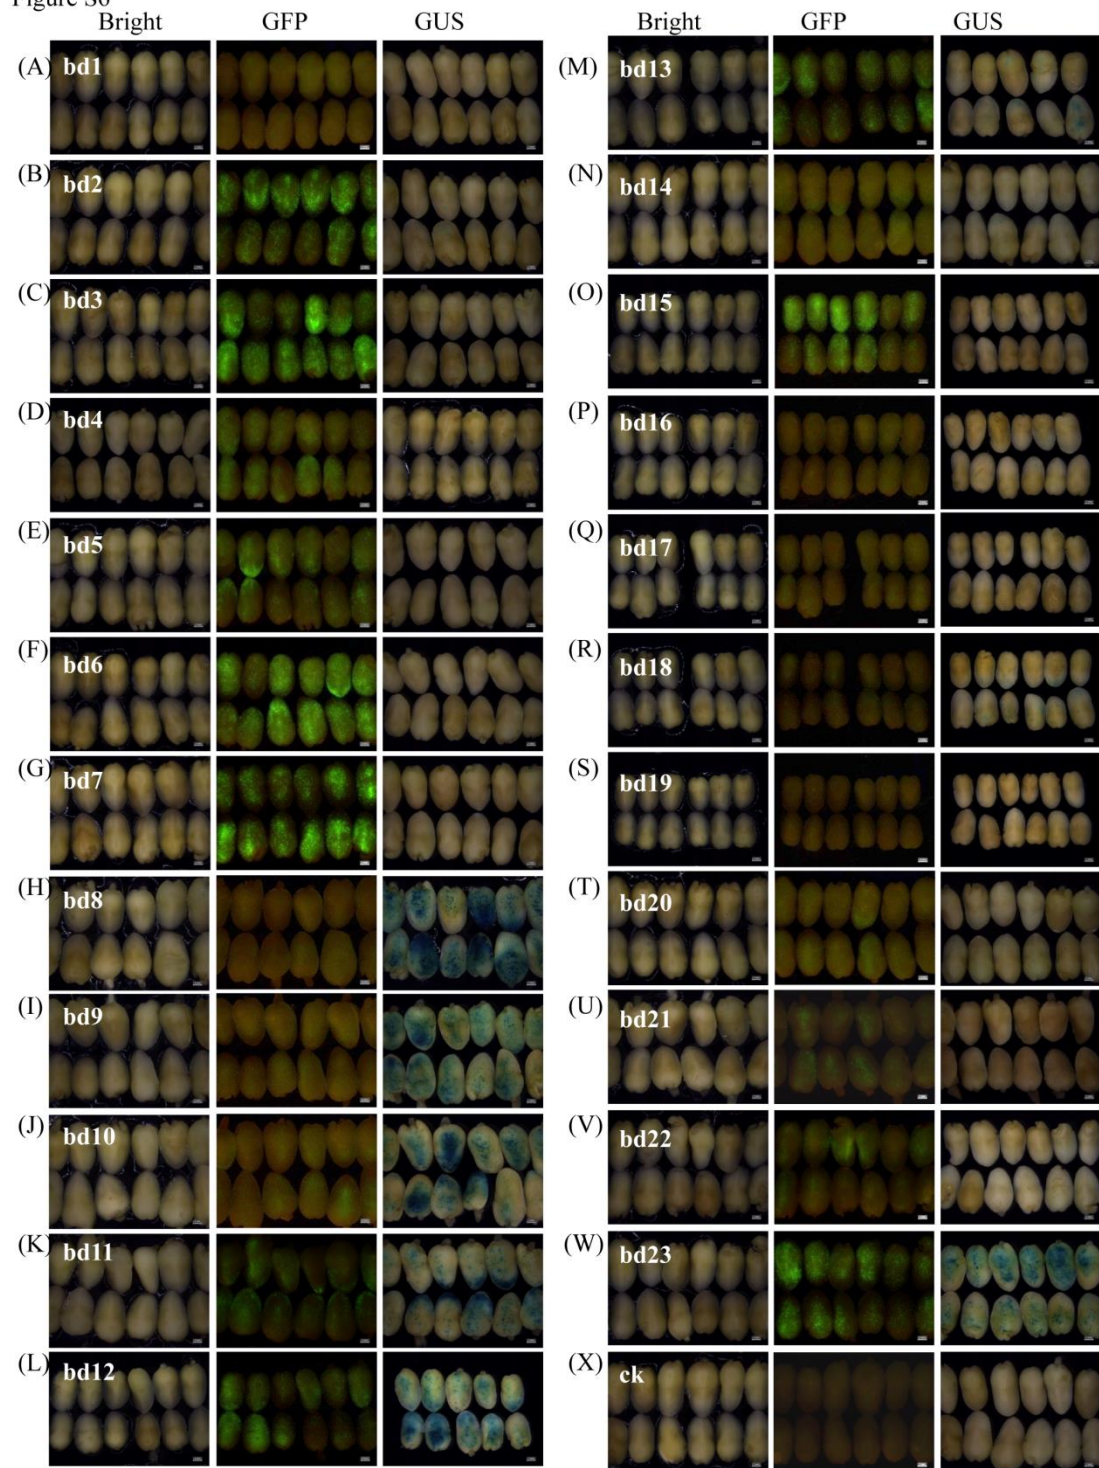

Table S1. Promoter sequences and cloning primers used in this work.

|                                  |        |                                     |
|----------------------------------|--------|-------------------------------------|
| primers used for RT-PCR          |        |                                     |
| <i>Def1</i>                      | DEF1F  | 5-TGCTGCTCCTCATCGTCGTTGC-3          |
|                                  | DEF1R  | 5-TTGCCGCCGCCGTAGCCTTC-3            |
| <i>Def2</i>                      | DEF2F  | 5-AGTCCAGGGCGACCGTGTG-3             |
|                                  | DEF2R  | 5-CGAGTGGTGCTGGCTCTTGC-3            |
| <i>Actin</i>                     | AC200F | 5-ATGTTTCCTGGGATTGCCGAT-3           |
|                                  | AC200R | 5-CCAGTTTCGTCATACTCTCCCTTG-3        |
|                                  |        |                                     |
| primers used for promoters clone |        |                                     |
| 2.0 kb P <sub>ZmDef1</sub>       | DEF1f  | 5-AAGCTTCGTCAGCAGTAGTTCTATTTTCAG-3  |
|                                  | DEF1r  | 5-ATTCCGGCCGGCTCTGCTGCTTGTGC-3      |
| 2.0 kb P <sub>ZmDef2</sub>       | DEF2f  | 5-AAAACTTTGGAGCCTAAACCTCTAAATTAAG-3 |
|                                  | DEF2r  | 5-CTGCAGCGCCGGCCGGCGTGGATCGGAT-3    |
| 635 bp P <sub>ZmBD1</sub>        | DEF1f1 | 5-aagcttATTCCGGCCGGCTCTGCTGCTTG-3   |
|                                  | DEF2r  | 5-CTGCAGCGCCGGCCGGCGTGGATCGGAT-3    |

Promoter sequences:

>635 bp P<sub>ZmBD1</sub>

attccggccgctctgctgcttgtgcttgctgactactgatgtgggatgagcgtcagatcgtatgctggatgaccctgctgctgttgctcgcagat  
ataggcgcggccggcgcgcggccggcgggtgaccgtggacggcgcgcgcatgcaagagcggcgcgcgtggcgcgagctgcggcggccgcg  
catgcccacgtggctgcccgcacgggctgcatgcccgcaggtcagctaggggagcagcagctgagccgagtgctgcccgtacgtagcgtccca  
gcagctgattctaactttctgcttaactttctaggtgcatggtaccgatccaccaccaccctctcctgctgctgccacgcacgggatcggagga  
ggtgtccttgacgtcgtcgcagtcgacgacgagctcgcagcaccggcggctagctggcctcacgcggtgcggtggcagcaggtggcagggag  
cgagccgccacgtcccgcgtgccacgtgagataagtaccctgctctgctatagagctcgaactcgtggccatagatccattgattgatcgga  
cggacgcgcgtcctccggtcccgtccgtaataactgatccgatccacgccggcggcg

>2.0 kb P<sub>ZmDef1</sub>

ttcgtcagcagtagttctatttcagagaatgaaaggactctgtcagatcccctaactttctcgtgaactgtacgtggaagcacgccctagttgctgg  
ctgtgtaactctgattctggatgcaacgaagaatgtaaaatgcagcgtctgttatttattagcgtgttctgtaactggactggaatgatcagcttga  
acgacgcgggtgaggaggcgtgccagcgcggcgtggcgggtatcgcagagcccggcggcagcagcagccggaccaggacgccgtggagtctg  
caacaagtacgggtggccctcgtctaccggcgtccggcacttcaggcactgatcagcggcagcgggtggcagcggagaccgtgacgacggac  
gatgggagggacctctatagctgctgctgatcggcgggtggctggaaggaaggatctggcgtttcatcccagcgtgatgccggctggcgtttctt  
ggctactagggagactctgatggtgctgatactcagtgcaaaagtagagaagatacaaatggcagaactgttactgtattgcaggaactatag  
ttatatacaagaatataagtattttaataatgtgccgttgaaataactgttagtagttgatcacatgagataaatggtatacaacaaatgtcgcctc  
tcgagaggatgggtcgggtgggtcccgtttgtatataatgacgtcgcagcctggcaagaggtgattgagcttaactaactcttgcgggtgatgaa  
atcggaacggctgctgaccgggtggatcgcacagctgctgctagaagcatgcaaaaggctacatgccgtgttattgttataatattattgctgctc  
acgttacctgacaccacattacatgcatgacgggtacgtaggtgtgacagctagccaaagggtgttacttagtactaccacagttcagttctggaagc  
caagggtgttcaagagctttgcttagcagcctctggcacctgcagtagcggaggtggcagtagccggcgggtccaccgccctccttgcagc  
actggtgctgcagaggcggctggagatgcaggggaacgagtggtgctggctcttgcctatgcacaccggcctccgccaccatgctgctgctg  
tcccggctgctgtagtctgtgctggatagcgggaaggaggaagatccatgaggcagcagaaattaagaataactgtaattaatcaacgaataaa



tcagtatgcttttttatttacgtgagagcaggagcagcgcgccaggaggagcgcgcacacggctgccctggacttgatgagctccatcggcgccggc  
gtggatcggatcagtggttattacggacgggaccggagacgcgcgtccgatcaatcaatggatctatggccagcaggtgcgagctctatatag  
cagagcagggtactatactacgtggcagcgcggcacgtggcggctcgtccctgccacctgctgccaccgaccgcgtgaggccagctagcg  
gccggtgctgcgagctcgtcgtcactcgagacgacgtcaaggacaacctcctccgatcccgctgctggcagacagccgaggagggtgggtgc  
gtggatcgggtaccatgcacctagaaaagttagaacagaaaagttagaatcagctgctggcgacgctacgtacggcacgactcggctcagcgtgctgc  
ccctagctgacctggcgcgatgcagcccgtcggggcagccacgtcgcgatgcgcggccgccgagctcggccgcgtcggcgtcttgcacgc  
gcgcgccgtccacgtccaccggccggcgcgccggccgcgcctatatctgcgagccaacaagcaggcagggtcatccagcatacagatctga  
cgctcatcccacatcagtagtcgaccaagcacaagcagcagagccggccggaat

>2.0 kb P<sub>ZmDef2</sub>

aaaaactttggagcctaacctctaattaaagtttgattcagatgattgtcgaactaatcagcaaatcgtgacctgacatcatgaatgttatgctacaat  
ccagtttaataattatacacttcaaaactgtacacataaaatgaatatgacaagttgtacacactacttgatgtctctcaagatgtctacgtatacaca  
atatgcttcaagctgtagacatacagcagcaccagtgtaataacccccgatgagcacgtactgtacaagaaaaatcgagagaacgccgacacgag  
aaagcgagaacatgcaccgtccacaccagtgtaactcccgatgagcatgtatgtgacaagaaaaatcgagagaacgcgacatggctccatcagc  
gtagcggccggcggccgtgtggcacgtgctgacttacattagataaattagacattaggattacatagcacgtatctttatc gatctcgaacaatt  
tcacatatttaacgccatggaaaaatataaaaattgtattacacattattacgtacaggcaataactgggtgagctagcacaagctgggataaacca  
agcaaaagtcgtaataatgtaacttggatgcaacttgcatagttattgatataaaataaactgttgcctctaaattttcgataagagtatacgaac  
atcaggacatgtatataactgcacgtggttattgtcaagatgcatgacctcatcaaacgctggcggccggatgcatgggtggacgtcgacg  
acacagctcatgagtactcgaacgacagacgacgacgtataggaacgatggccgtgcatgctagctcggcgtccacacagctcggcgcgcgtac  
ggctacatgtggtgattattgcatgtagtgtagacgtatagtagtacatatttagcagccggccacgacgtcgatccttattaatttaaaagccgat  
atagctagctttagatcctagagcctagctagctagcactccctgatgcacttgcactggcgcgatgatccgctcgcagttgccgcccgtagccct  
cctgcaagcacacctgcgcgagttgtgctggacatgcagacccccctgaagcccgcgctccggcggccggcacacgcgcgctccccaacgg  
cgccgctcctctgcatgcattgcaggcacgcgtagtagcatgatgatgtgtcgtgtatataatgtagtggtgtagctatagtagtagtacgta  
cgcgcaacgacgatgaggagcagcaggagcagccacctgcggcgtcggcaccttctgatcgtccacatattccggccggctctgctgcttgtg  
cttggctgactactgatgtgggatgagcgtcagatcgtatgctggatgacctgcctgcttggctcgcagatagggcggccggggcgcggg  
ccggcgggtggaccgtggacggcgcgcgatgcaagagcggcgcgcgtggcagctgcggcggccgcgatgcgcacgtggctgccgcac  
gggctgcatgcgcggcaggtcagctaggggagcagcgtgagccgagtgctgctgacgtcggcagcagctgattctaacttctgttcta  
aacttttaggtgcatggtaccgatccaccaccaccctcctcgcctgtctgccacgcacgggagcggaggaggtgtccttgacgtcgtctcagat  
cgacgacgagctcgcagcaccggccgctagctggcctcacgcggtgctggcagcaggtggcagggagcagccggccacgtgccgcgctgc  
cacgtgagataagtagcctgctctgctatagagctcgaactcgtggccatagatccattgattgatcggacggacgcgctcggctccgctc  
cgtaataacactgatccgatccacggccggcg
